# Supplementary material for: Crystal structures, magnetic and spectroscopic properties of manganese(II), cobalt(II), nickel(II) and zinc(II) dichloro complexes bearing two 2-pyridyl-substituted imino nitroxides †
Source: Royal Society of Chemistry journal article supplement (doi:10.1039/b010243l), 2001-01-01
Supplement: b010243l.doc [file b010243l.doc]

##### Supplementary information

**Crystal structures, magnetic and spectroscopic properties of manganese(II), cobalt(II), nickel(II) and zinc(II) dichloro complexes bearing two 2-pyridyl-substituted imino nitroxides**

**Youhei Yamamoto, Takayoshi Suzuki and Sumio Kaizaki***

**Contents**

Figure S1 Perspective drawings of (*a*) (*OC-6-22*)-[CoCl2(IM2py)2] **2**, (*b*) (*OC-6-22*)-[NiCl2(IM2py)2] **3** and (*c*) (*OC-6-22*)-[ZnCl2(IM2py)2] **4**. Hydrogen atoms are omitted for clarity, and the thermal elipsoids are drawn at 50% probability level.

Figure S2 Temperature-dependence of vis-NIR absorption spectrum of complex **2** in dichloromethane: 300 K (• • • • • • •), 275 K (– • • – • • –), 250 K (— • — • —), 225 K (– – – –) and 200 K (———).

Figure S3 Temperature-dependence of vis-NIR absorption spectrum of complex **1** in dichloromethane: 300 K (• • • • • • •), 275 K (– • • – • • –), 250 K (— • — • —), 225 K (– – – –) and 200 K (———).

Equations S1–S4 Equations used in the analyses of magnetic susceptibitily data for complexes **4**, **1**, **3** and **2**, respectively.

**Figure S1** Perspective drawings of (*a*) (*OC-6-22*)-[CoCl2(IM2py)2] **2**, (*b*) (*OC-6-22*)-[NiCl2(IM2py)2] **3** and (*c*) (*OC-6-22*)-[ZnCl2(IM2py)2] **4**. Hydrogen atoms are omitted for clarity, and the thermal elipsoids are drawn at 50% probability level.

**Figure S2** Temperature-dependence of vis-NIR absorption spectrum of complex **2** in dichloromethane: 300 K (• • • • • • •), 275 K (– • • – • • –), 250 K (— • — • —), 225 K (– – – –) and 200 K (———).

**Figure S3** Temperature-dependence of vis-NIR absorption spectrum of complex **1** in dichloromethane: 300 K (• • • • • • •), 275 K (– • • – • • –), 250 K (— • — • —), 225 K (– – – –) and 200 K (———).

**Equations S1** Equation used in the analyses of magnetic susceptibitily data for complex **4**.

2*N*2*gR(bis)*2 *MW(bis)* *N*2*gR(mono)*2

**M = ———————— • (1–**) + ———— • —————— • **

*kT*{3 + exp(2*J’*/*kT*)} *MW(mono)* 4*kT*

where *J*’ is a coupling constant between two IM2py (*H* = – 2*J*'***S***R1• ***S***R2), *gR(bis)* and *gR(mono)* are *g* factors of IM2py radicals in [ZnCl2(IM2py)2] and [ZnCl2(IM2py)], respectively, *MW(bis)* and *MW(mono)* are molecular weight of [ZnCl2(IM2py)2] and [ZnCl2(IM2py)], respectively, and ** is an impurity factor of comtamination with [ZnCl2(IM2py)]. Other symbols have their usual meanings.

**Equations S2** Equation used in the analyses of magnetic susceptibitily data for complex **1**.

*N*2 10*g1*2 + 35*g2*2e5x + 84*g3*2e12x + 35*g4*2e7x–2x’

**M = —— • ———————————————————

4*kT* 2 + 3e5x + 4e12x + 3e7x–2x’

where x and x' denote *J*/*kT* and *J’*/*kT* (***H*** = – 2*J* ***S***Mn•(***S***R1 + ***S***R2) – 2*J*' ***S***R1• ***S***R2), respectively, and *g1*, *g2*, *g3*, and *g4* express (7*gMn* – 2*gR*)/5, (31*gMn* + 4*gR*)/35, (5*gMn* + 2*gR*)/7, and *gMn*, respectively. Other symbols have their usual meanings.

**Equations S3** Equation used in the analyses of magnetic susceptibitily data for complex **3**.

*N*2 (*gNi* + *gR*)2(5 + e–4x) + 4*gNi*2e–2x–2x’

**M = ———— • ———————————————

2*k*(*T*–**) 5 + 3e–4x + e–6x + 3e–2x–2x’

where x and x' denote *J*/*kT* and *J’*/*kT* (***H*** = – 2*J* ***S***Ni•(***S***R1 + ***S***R2) – 2*J*' ***S***R1• ***S***R2), respectively. The parameter ** is Weiss constant, and other symbols have their usual meanings.

**Equations S4** Equation used in the analyses of magnetic susceptibitily data for complex **2**.

*N*2 35*g1*2 + 10*g2*2e–5x + *g3*2e–8x + 10*g4*2e–3x–2x’

**M = ———— • ———————————————————

4*k*(*T*–**) 3 + 2e–5x + e–8x + 2e–3x–2x’

where x and x' denote *J*/*kT* and *J’*/*kT* (***H*** = – 2*J* ***S***Co•(***S***R1 + ***S***R2) – 2*J*' ***S***R1• ***S***R2), respectively, and *g1*, *g2*, *g3*, and *g4* express (3*gCo* + 2*gR*)/5, (11*gCo* + 4*gR*)/15, (5*gCo* – 2*gR*)/3, and *gCo*, respectively. Other symbols including ** have their usual meanings.
